# Supplementary material for: Insertion of Dye-Sensitized Solar Cells in Textiles using a Conventional Weaving Process
Source: PubMed Central journal article supplement (PMC4471890; doi:10.1038/srep11022), 2015-06-18
Supplement: srep11022-s1.pdf [file srep11022-s1.pdf]

## **Supplementary Information**

### **Insertion of Dye-Sensitized Solar Cells in Textiles using a Conventional Weaving Process**

**Min Ju Yun<sup>1,2</sup>, Seung I. Cha<sup>\*1</sup>, Seon Hee Seo<sup>1</sup>, Han Seong kim<sup>2</sup>, Dong Y. Lee<sup>1</sup>**

**1. Nano Hybrid Technology Research Center, Creative and Fundamental Research Division,  
Korea Electrotechnology Research Institute**

**2. Department of Organic Material Science and Engineering, Pusan National University**

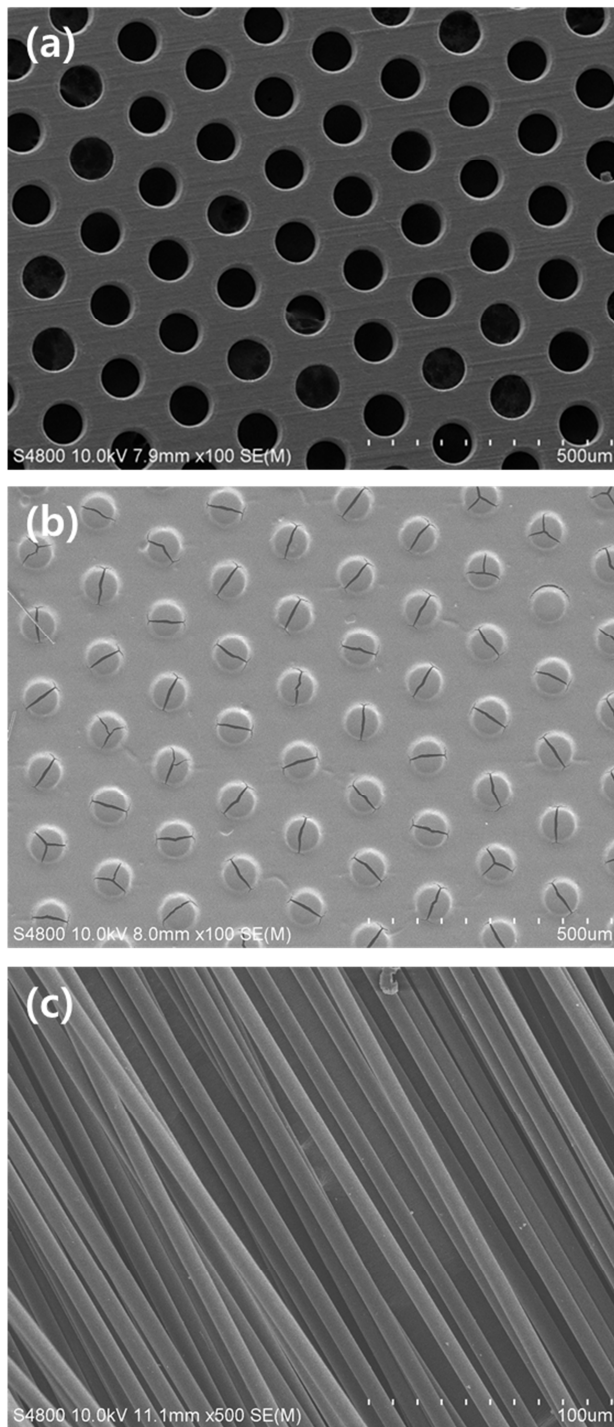

**Figure S1.** Scanning electron microscopy (SEM) image of (a) the etched mesh of 304 stainless steel and (b) the photoanode, (c) counterelectrode carbon yarn for the dye-sensitized solar cells (DSSCs) incorporated into the textile.

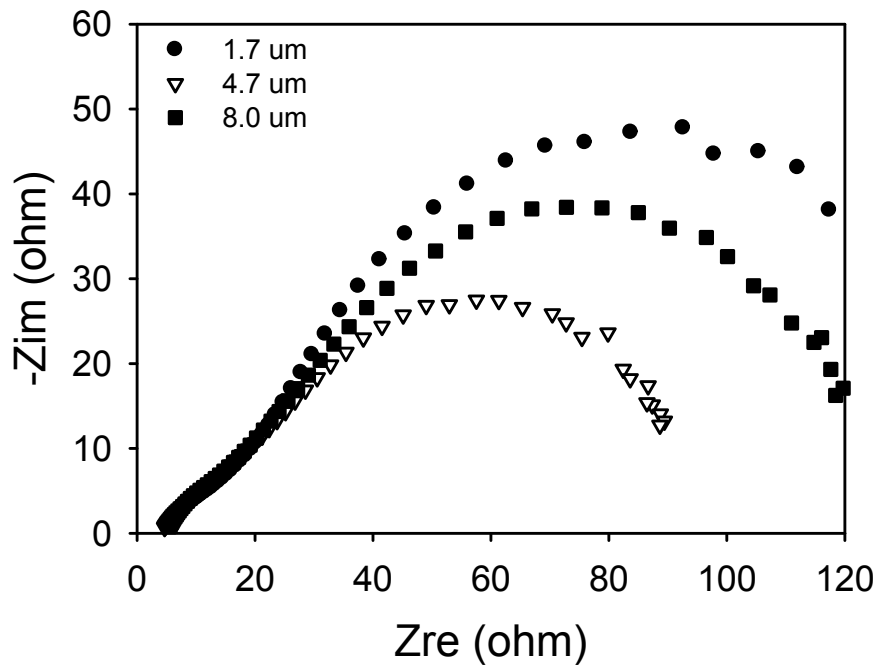

(a)

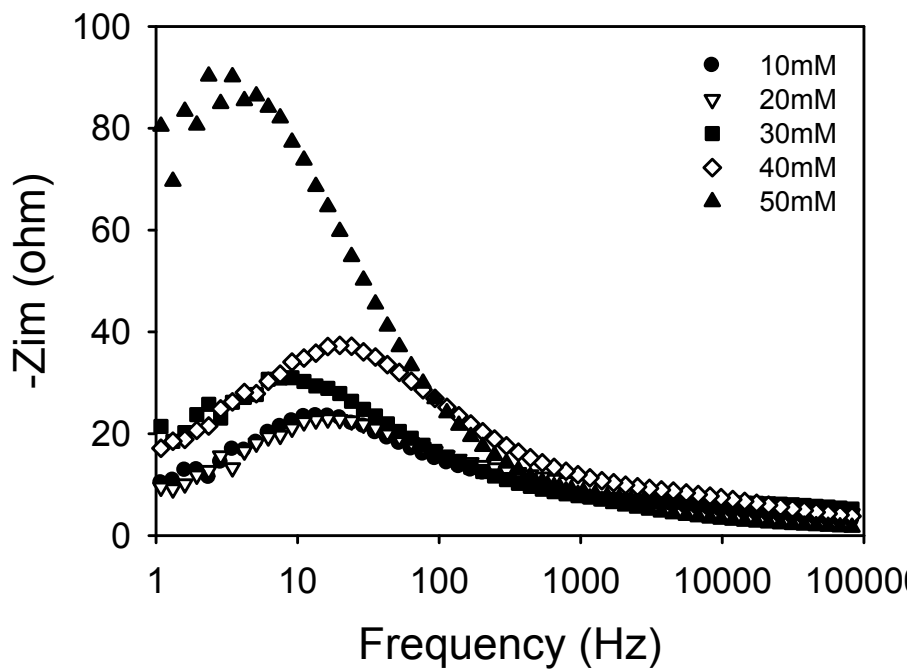

(b)

**Figure S2.** (a) Nyquist plot for Fig. 3(c). (b) Bode plot for Fig. 3(f).

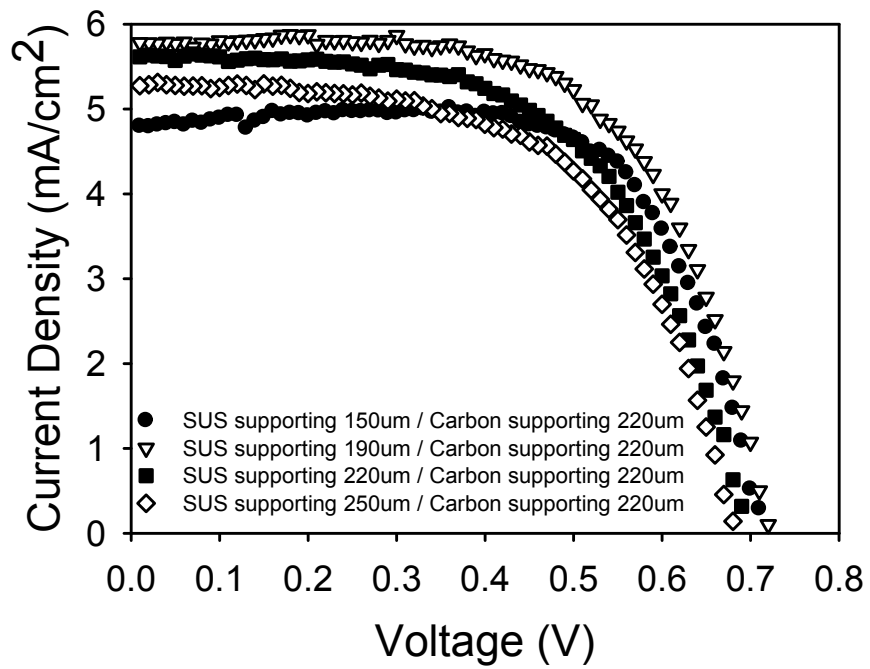

(a)

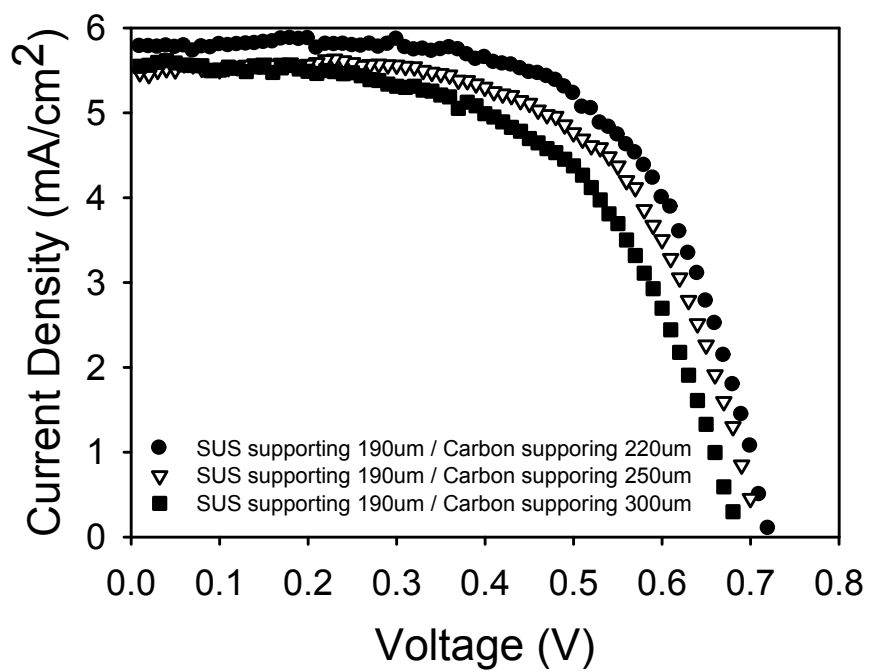

(b)

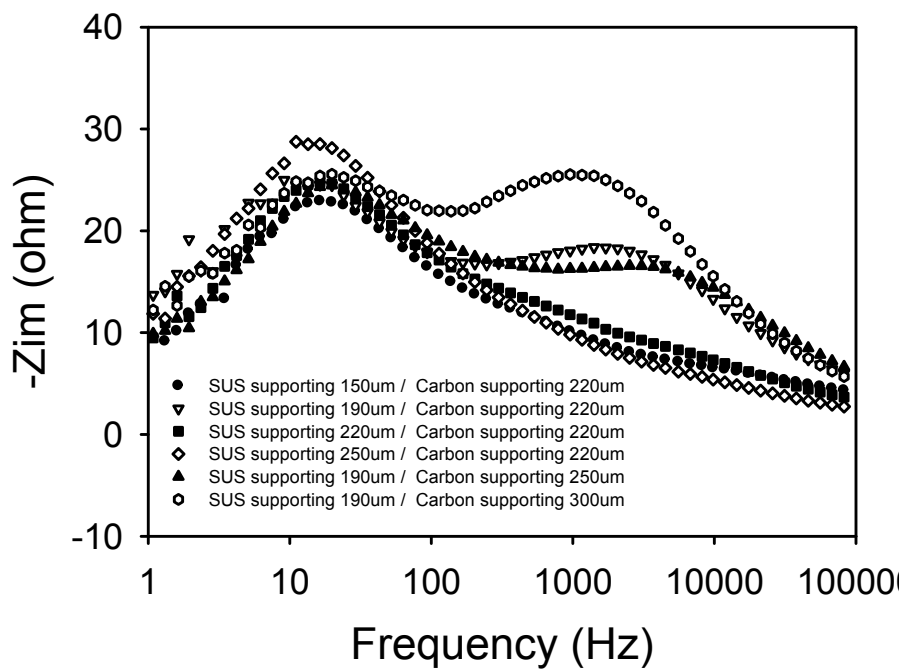

(c)

**Figure S3.** (a) Current density ( $J$ )–voltage ( $V$ ) characteristics of DSSCs inserted in the textile with various radius of photoanode supporting nylon warps fixing the counterelectrode-supporting warp diameter of 220  $\mu\text{m}$ . (b)  $J$ – $V$  characteristics of DSSCs inserted in the textile with a various radius of counterelectrode-supporting nylon warps fixing a photoanode-supporting warp diameter of 190  $\mu\text{m}$ . (c) Bode plot for Fig. 4(c).

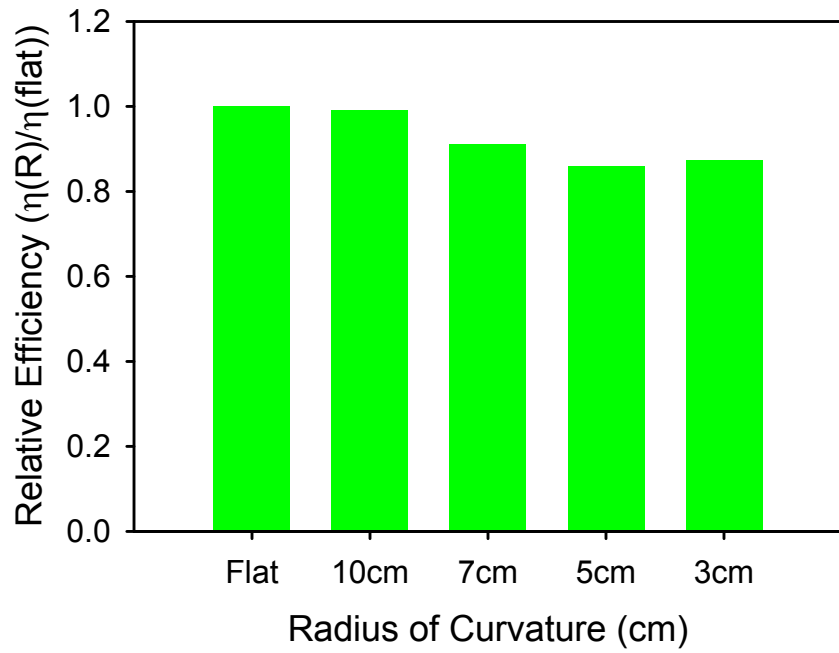

**Figure S4.** The relative energy conversion efficiency to flat state of inserted DSSCs according to bending radius of curvature.
